# Supplementary material for: Silica-based hierarchical porous Janus microcapsules: construction and support of Au nano-particle catalyst inside
Source: Royal Society of Chemistry journal article supplement (doi:10.1039/c7cc03077k), 2017-01-01
Supplement: c7cc03077k1.pdf [file c7cc03077k1.pdf]

*Electronic Supplementary Information*

## **Silica-Based Hierarchical Porous Janus Microcapsules: Constructure and Supported Au Nano-Particles Catalyst inside**

*Xia Kong,<sup>a</sup> Changcheng Wu,<sup>a</sup> Lei Feng,<sup>a</sup> Jiayan Qu,<sup>a</sup> Pange Liu,<sup>a</sup> Xiaomei Wang<sup>\*a</sup>,  
Xu Zhang<sup>\*a,b</sup>*

*<sup>a</sup> School of Chemical Engineering and Technology, Hebei University of Technology,  
Tianjin 300130, P.R. China. Email address: [xmwang@hebut.edu.cn](mailto:xmwang@hebut.edu.cn);  
[xuzhang@hebut.edu.cn](mailto:xuzhang@hebut.edu.cn); Tel/Fax: +86 022 60200443*

*<sup>b</sup> National-Local Joint Engineering Laboratory for Energy Conservation of Chemical  
Process Integration and Resources Utilization*

\*Corresponding author: E-mail: [xmwang@hebut.edu.cn](mailto:xmwang@hebut.edu.cn) and [xuzhang@hebut.edu.cn](mailto:xuzhang@hebut.edu.cn)

## **Experiment**

### **Materials:**

Styrene (St), Potassium persulfate (KPS), Tetraethoxysilane (TEOS), Ammonium Hydroxide ( $\text{NH}_3 \cdot \text{H}_2\text{O}$ , 28%), Tetrahydrofuran (THF, 99.5%), and Polyvinylpyrrolidone (PVP-K30,  $M_w = 30\,000\text{ g} \cdot \text{mol}^{-1}$ ) were ordered from Tianjin Guangfu Fine Chemical Research Institute. KPS, St and TEOS were respectively used with recrystallization and vacuum distillation to remove impurities and inhibitor. Hexadecyltrimethoxysilane (HETMS,  $\geq 85\%$ ), 3-Aminopropyltriethoxysilane (APTES, 98%, AR), Trisodium citrate dehydrate ( $\text{Na}_3\text{C}_6\text{H}_5\text{O}_7 \cdot 2\text{H}_2\text{O}$ , AR), sodium borohydride ( $\text{NaBH}_4$ , 98%, AR) and 4-nitrophenol (4-NP) were purchased from Aladdin Industrial Corporation. Chloroauric Acid ( $\text{HAuCl}_4 \cdot 4\text{H}_2\text{O}$ ) was obtained from j&k chemical. All other reagents were used as received.

### **Synthesis of PVP-functionalized polystyrene microspheres:**

0.065 g PVP was added to 180 mL ultrapure water in four round bottom flask. 10 mL of St was dropwise added under the protection of Ar. After half-hour, 0.1 g of KPS slowly added at 70 °C. The polymerization last for 13 h under a constant stirring rate of 180 rpm. The synthesized polystyrene (PS) microspheres were collected by centrifugation and finally dried in vacuum oven for further use.

#### **Preparation of core/shell composite microspheres:**

0.1 g of freeze-dried PS microspheres was dispersed in 6 mL ethanol under ultrasonication for 30 min. After 33  $\mu\text{L}$  of  $\text{NH}_3 \cdot \text{H}_2\text{O}$  and 250  $\mu\text{L}$  of ultrapure water were added into the above mixing dispersion within 5 min under the magnetic stirring, 300  $\mu\text{L}$  of TEOS was added into the reaction system at ambient temperature for 10 h to enable the sol-gel forming silica shell. The obtained mesoporous silica-coated PS microspheres, denoted as  $\text{PS}@\text{SiO}_2$ , were separated and washed with ethanol, and then dried under vacuum for further use.

#### **Synthesis of alkyl chains-functionalized $\text{PS}@\text{SiO}_2$ composite microspheres:**

0.1 g of vacuum-dried  $\text{PS}@\text{SiO}_2$  core-shell composite particle was dispersed in 10 mL of ethanol under ultrasonication for 30 min. 60  $\mu\text{L}$  of HETMS was added into the above dispersion under stirring at 80 °C for 10 h. The particles were separated and washed with ethanol to obtained outer surface alkyl chains-functionalized  $\text{PS}@\text{SiO}_2$  composite microspheres. The materials were denoted as  $\text{PS}@\text{SiO}_2\text{-CH}_3$ .

#### **Synthesis of alkyl chains-functionalized hierarchical porous $\text{SiO}_2$ microcapsules with open-mouthed:**

0.1 g of vacuum-dried  $\text{PS}@\text{SiO}_2\text{-CH}_3$  composite microspheres was dispersed in 2 mL of ethanol under ultrasonication for 10 min. Then, 4 mL of ethanol/THF (1:1 v/v) mixture solution was rapidly added into the above composite dispersion under magnetic stirring at 25 °C for 20 min to obtain the anisotropic snowman-like  $\text{PS}@\text{SiO}_2\text{-CH}_3$  composite particles. Subsequently, the particles were washed with THF for five times to remove PS template, and the obtained outer surface alkyl chains-functionalized  $\text{SiO}_2$  microcapsules with open-mouthed was washed with

ethanol to remove THF, and then dried under vacuum. The obtained particles were denoted as HPMs SiO<sub>2</sub>-CH<sub>3</sub>.

#### **Synthesis of bifunctional hierarchical porous Janus SiO<sub>2</sub> microcapsules:**

0.05 g of vacuum-dried HPMs SiO<sub>2</sub>-CH<sub>3</sub> microcapsules was dispersed in 20 mL of ethanol, 120  $\mu$ L of APTES was added into the above composite dispersion. The reflux reaction was held for modification at 80 °C for 10 h. Finally, the obtained silica-based bifunctional hierarchical porous Janus microcapsules with amine groups on the inner surface and alkyl chains on the outer surface, denoted as HPJMs SiO<sub>2</sub>, were washed ethanol for further uses.

#### **Supported of Au NPs onto the inner surface of HPJMs SiO<sub>2</sub>:**

0.012 g of HAuCl<sub>4</sub> was dispersed in 120 mL of ultrapure water, 0.0085 g of Na<sub>3</sub>C<sub>6</sub>H<sub>5</sub>O<sub>7</sub> was added into the above dispersion under powerful mechanical stirring for 1 h. Subsequently, 1.44 mL of NaBH<sub>4</sub> aqueous solution (0.38 Wt %) was added into the above reaction system. After further mechanical stirring for 2 h, the solution containing Au NPs were obtained. The obtained HPJMs SiO<sub>2</sub> was dispersed in the excess Au NPs solution to load Au NPs. The dispersion was subjected to ultrasonication for 2 h. And the obtained Au@HPJMs SiO<sub>2</sub> particles were washed with water for 3 times for further use.

#### **Catalytic reduction of 4-NP with Au@HPJMs SiO<sub>2</sub>:**

4-NP (3 mL, 0.1 mM) was added in a quartz cuvette with NaBH<sub>4</sub> (0.002 g). The Au@HPJMs SiO<sub>2</sub> catalysts suspension (0.1 mL, 0.4g/L) was rapidly injected into the above solution. The mixture was in situ recorded every 1 min to monitor the successive reaction progress.

To investigate the reusability of Au@HPJMs SiO<sub>2</sub> catalysts, the catalysts were separated and washed with water for 3 times and keep the equal catalytic procedure.

The catalyst was reused for more 5 recycles under the same reaction procedure.

#### **Hierarchical porous SiO<sub>2</sub> microcapsules with open-mouthed:**

0.1 g of vacuum-dried PS@SiO<sub>2</sub> core/shell composite microspheres was dispersed in 2 mL of ethanol under ultrasonication for 10 min. Then, 4 mL of ethanol/THF (1:1 v/v) mixture solution was rapidly added into the above composite dispersion under magnetic stirring at 25 °C for 20 min to obtain the anisotropic snowman-like PS@SiO<sub>2</sub> composite particles. Subsequently, the particles were washed with THF for five times to remove PS template, and the obtained SiO<sub>2</sub> microcapsules with open-mouthed was washed with ethanol to remove THF, and then dried under vacuum, denoted as HPMs SiO<sub>2</sub>.

#### **Characterization:**

Diameter of particles measurement was carried out in water using a Malvern NanoZS90 Zetasizer. FT-IR spectra were obtained on a Fourier transformed infrared spectrometer (Bruker VECTOR-22) using KBr pellets. Scanning electron microscopy (SEM) images were recorded on a field-emission scanning electron microscopy (FEI Nova NanoSEM450, USA) with energy-dispersive X-ray spectrometer (EDX). Transmission electron microscopy (TEM) images were performed on a transmission electron microscope (JEM-1400). Nitrogen adsorption-desorption isotherms were performed at 77 K on a surface area and porosity analyzer (ASAP 2020M+C). The pore volume and pore size and the specific surface area were respectively computed by using the Barrett-Joyner-Halenda (BJH) model and the Brunauer-Emmett-Teller (BET) method. Water contact angle (WCA) images were recorded on a contact angle analyzer (KRÜSS DAS30). Thermal gravimetric analysis (TGA) was obtained using thermal gravimetric instrument (TA SDT/Q600) from room temperature to 800 °C at a heating speed of 5 °C /min under nitrogen atmosphere. The metal element content was determined on an inductively coupled plasma optical emission spectrometer (ICP-OES Agilent 725). X-ray photoelectron spectroscopy patterns were collected on an X-Ray photoelectron spectrometer (XPS, Thermo ESCALAB-250Xi, USA). X-ray diffraction (XRD) pattern was measured on an X-ray diffractometer

(Bruker D8-Davinci) with Cu K $\alpha$  radiation (40 KV, 150 mA) at the rate of 1°/min. The reduction of 4-Nitrophenol was monitored using a UV-vis spectrophotometer (VARIAN CARY300) at room temperature.

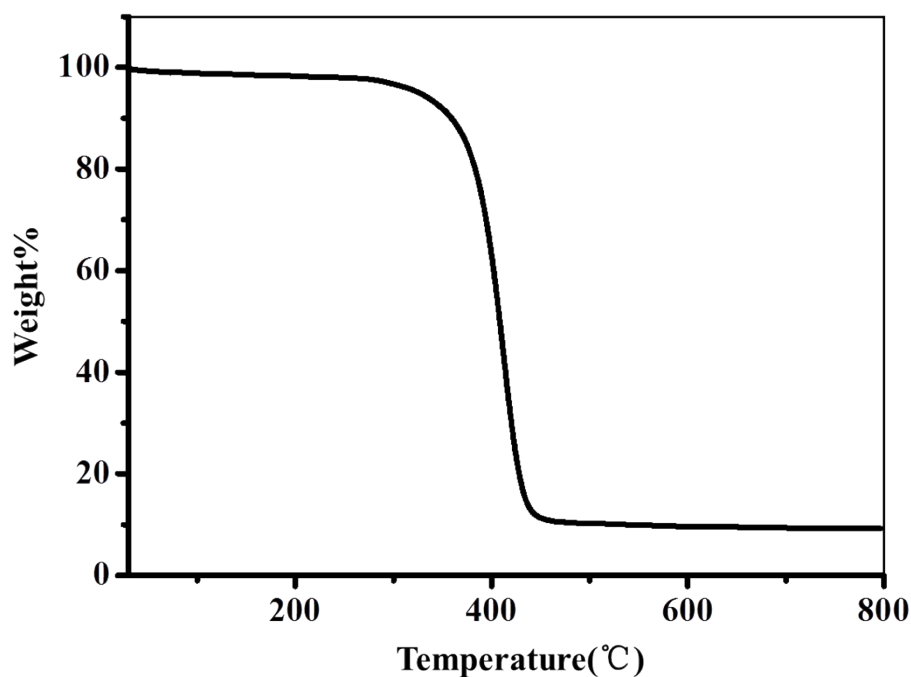

**Fig. S1** The TG analysis of PS@SiO<sub>2</sub> core/shell composite microspheres

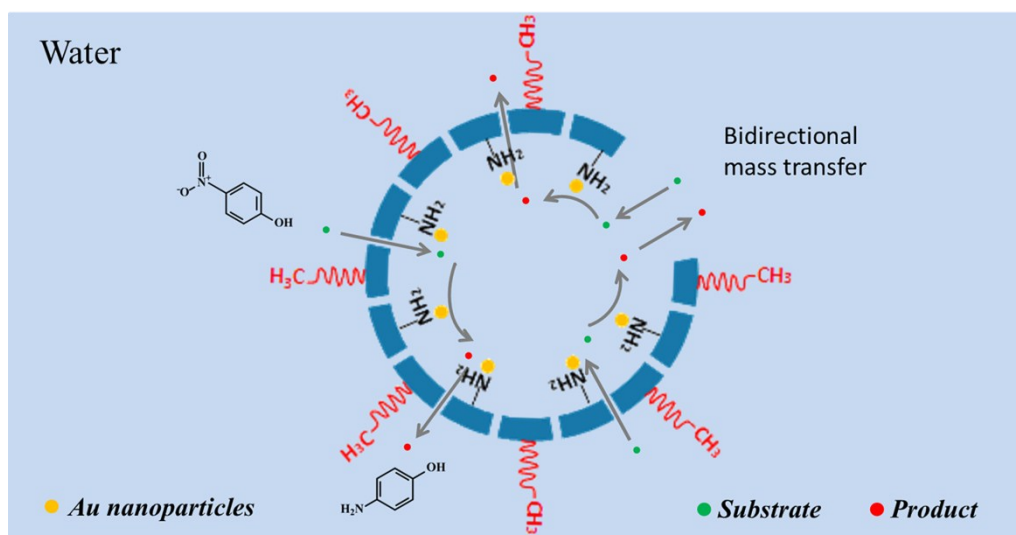

**Fig. S2** Schematic illustration of catalytic 4-NP reaction within the microreactor of Au NPs immobilized the inner surface of HPJMs SiO<sub>2</sub> in aqueous phase.

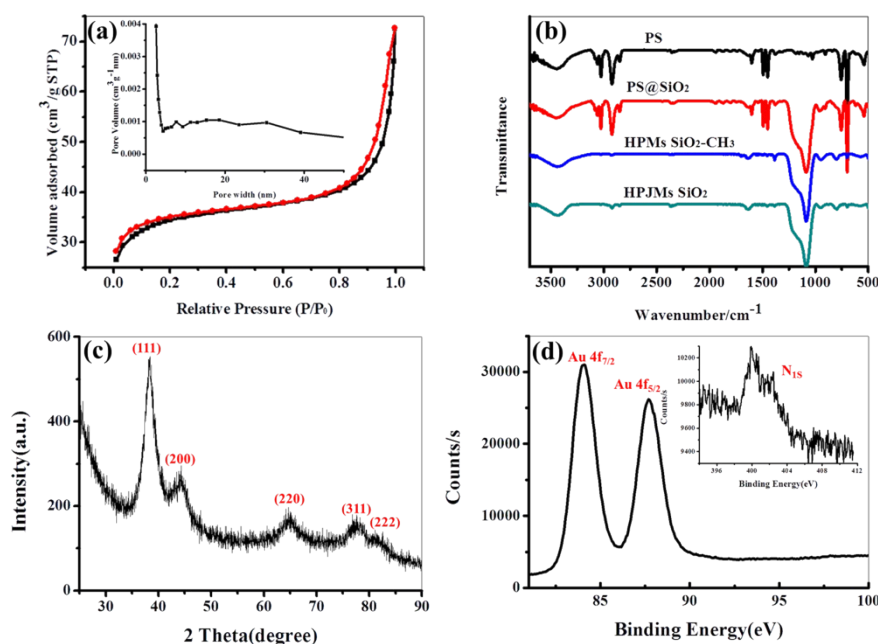

**Fig. S3** (a) The nitrogen adsorption–desorption isotherms and pore size distribution (inset) of the HPJMs SiO<sub>2</sub>; (b) FT-IR spectra of the PS microsphere template, PS@SiO<sub>2</sub> core/shell composite microspheres, HPMs SiO<sub>2</sub>–CH<sub>3</sub>, and HPJMs SiO<sub>2</sub>; (c) XRD patterns of the Au@HPJMs SiO<sub>2</sub>; (d) the high-resolution XPS pattern of Au 4f (inset is the spectrum of N 1s).

As shown in Fig. S3b, the FT-IR spectrum of the PS@SiO<sub>2</sub> composite microspheres showed that the intense absorption band at 1095 cm<sup>-1</sup> was assigned to the stretching vibration of the Si–O–Si groups, suggesting the formation of the silica shell.

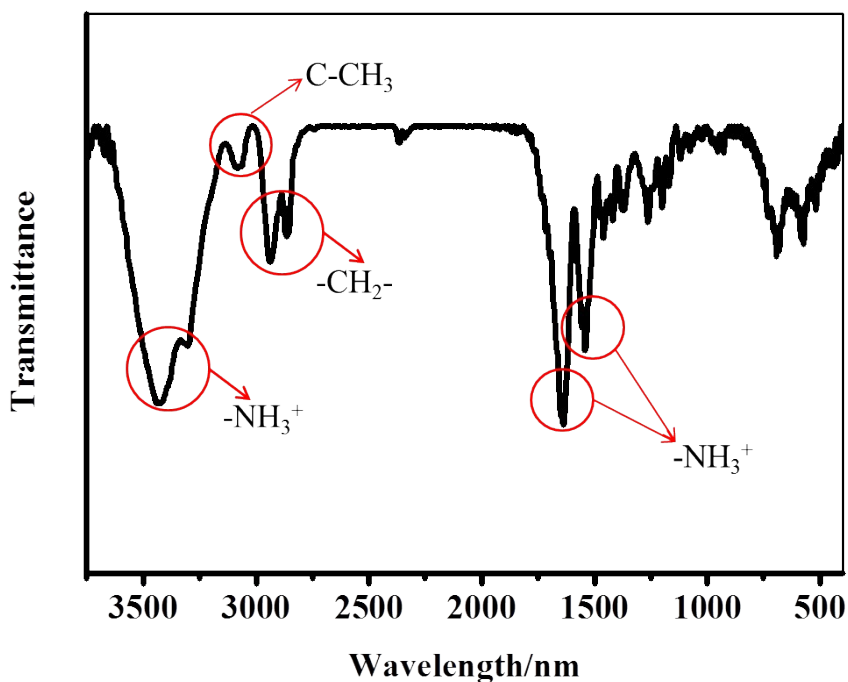

**Fig. S4** The FT-IR of the residues after etching the silica shell of HPJMs SiO<sub>2</sub> with HF.

The stretching vibration bands at 3424 cm<sup>-1</sup> and 3295 cm<sup>-1</sup> and the deformation vibration bands at 1637 cm<sup>-1</sup> and 1541 cm<sup>-1</sup> were attributed to the resulting -NH<sup>3+</sup>. Strong stretching vibration peaks at 2937 cm<sup>-1</sup> and 2864 cm<sup>-1</sup> and 3081 cm<sup>-1</sup> were assigned to -CH<sub>2</sub>- and C-CH<sub>3</sub>, respectively.

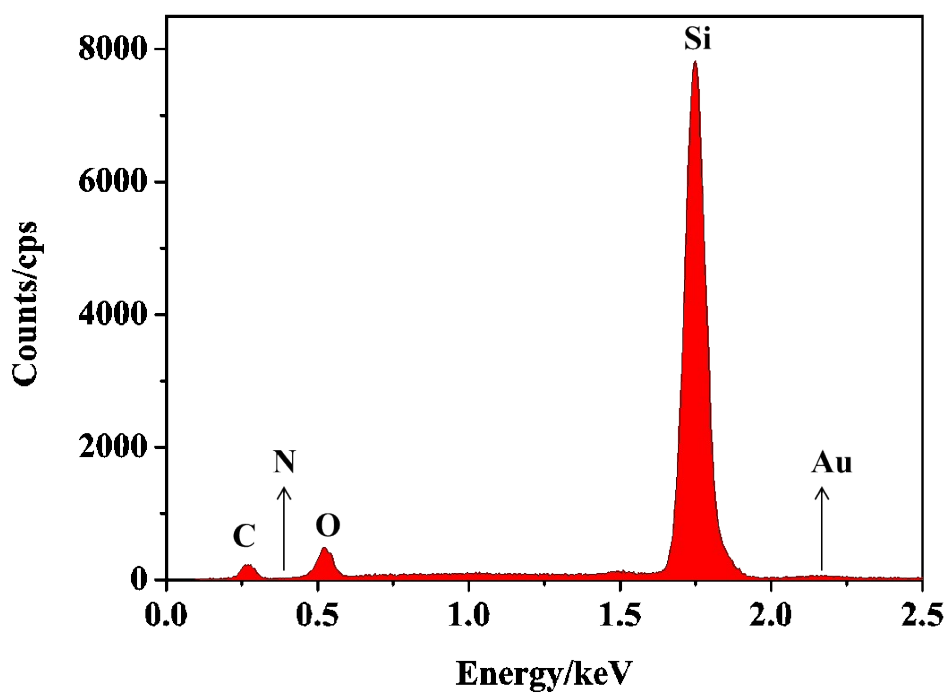

**Fig. S5** The EDX pattern of Au@HPJMs SiO<sub>2</sub>.

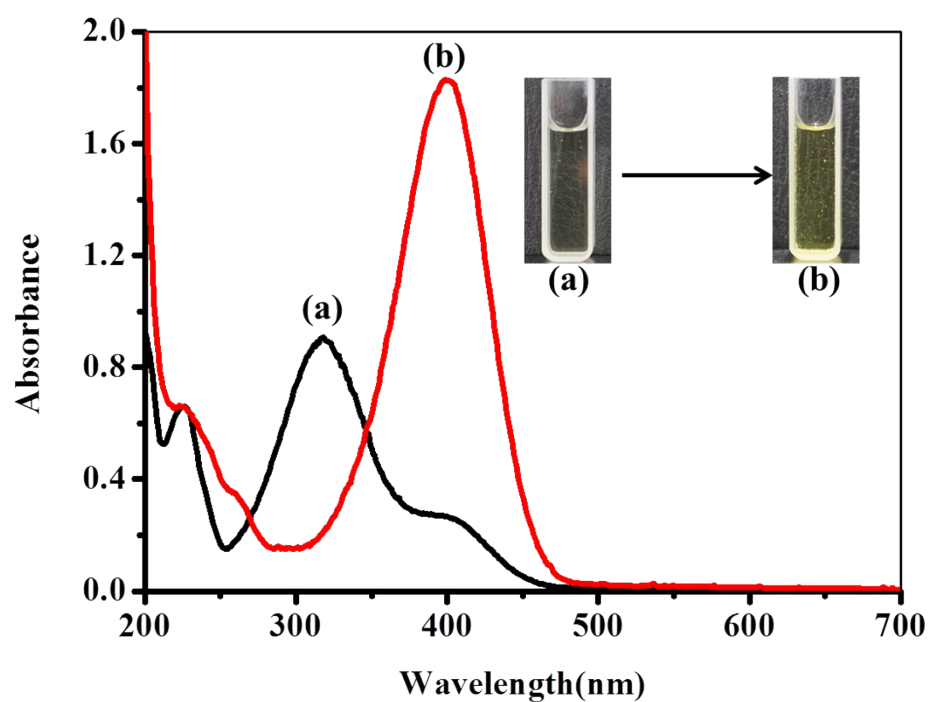

**Fig. S6** The UV-vis absorption spectra of (a) 4-NP; (b) the mixture solutions of 4-NP and  $\text{NaBH}_4$ .

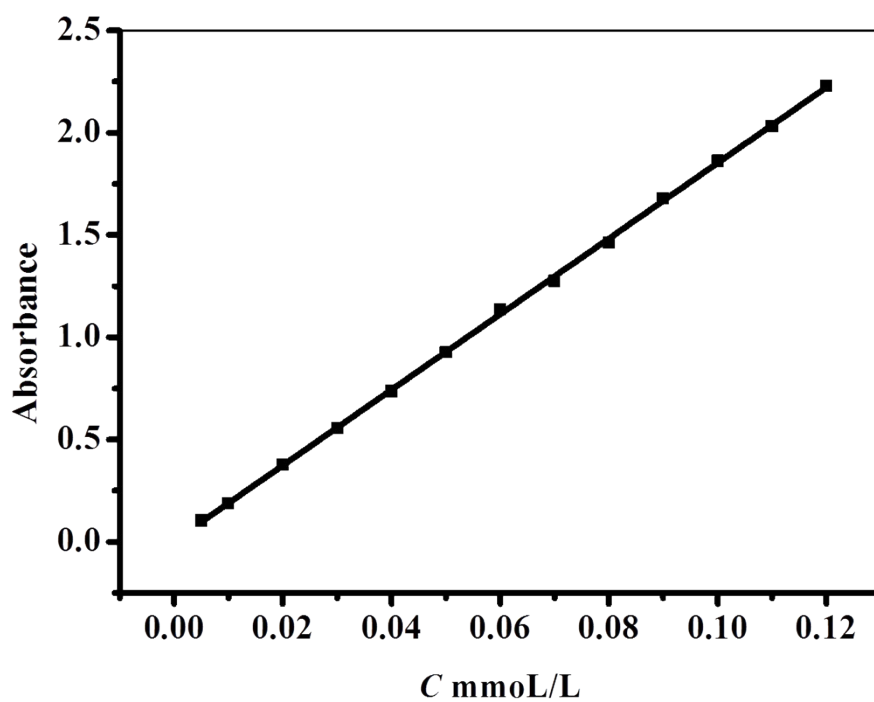

**Fig. S7** The calibration curve 4-nitrophenolate ion in certain concentrations of 4-NP.



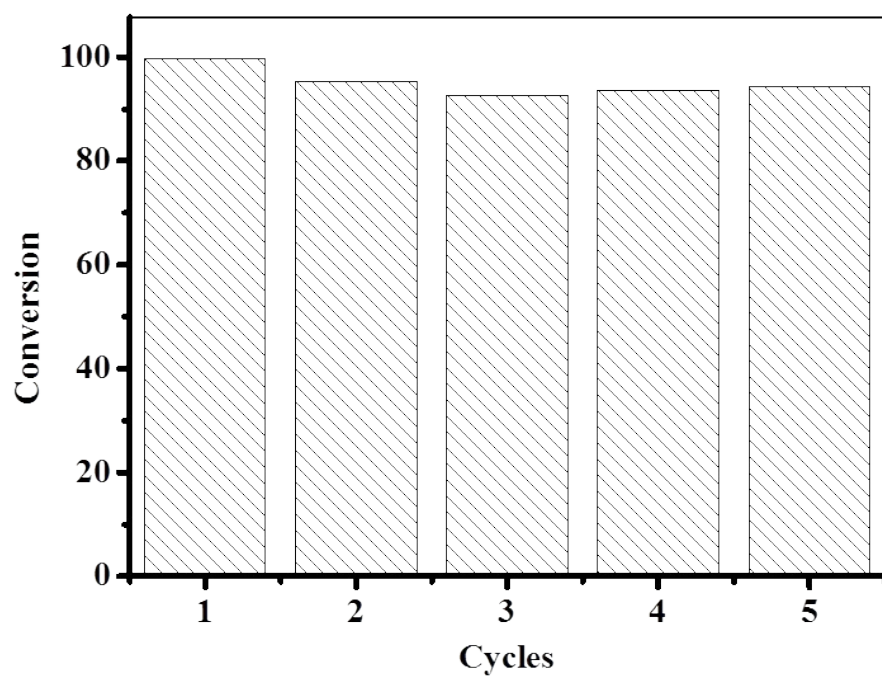

**Fig. S8** The reusability of Au@HPJMs SiO<sub>2</sub> as a catalyst for the reduction of 4-NP with NaBH<sub>4</sub>.

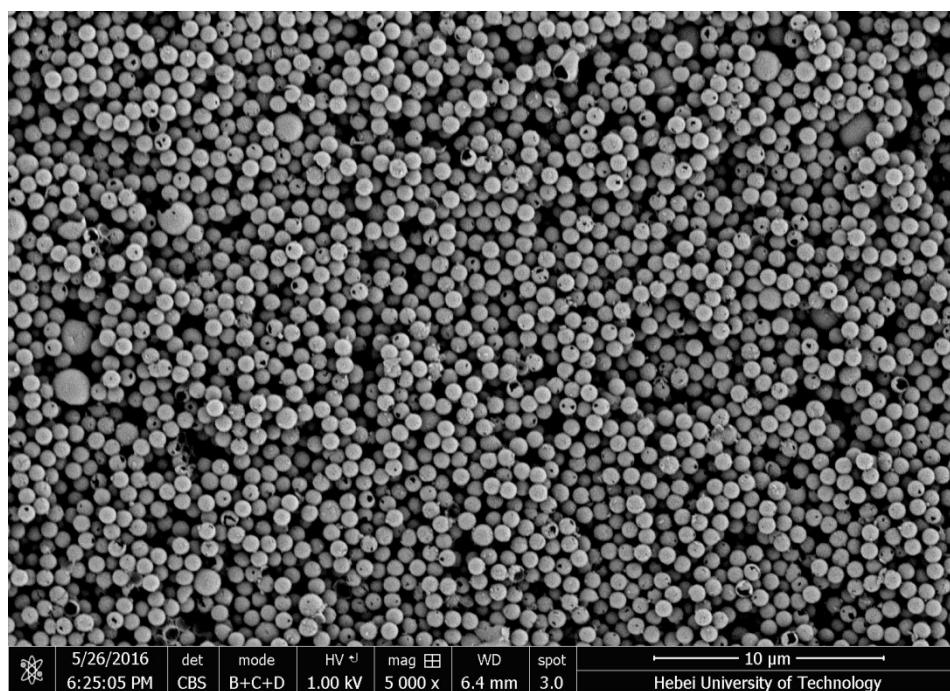

**Fig. S9** The SEM image of Au@HPJMs SiO<sub>2</sub> after 5 cycles.

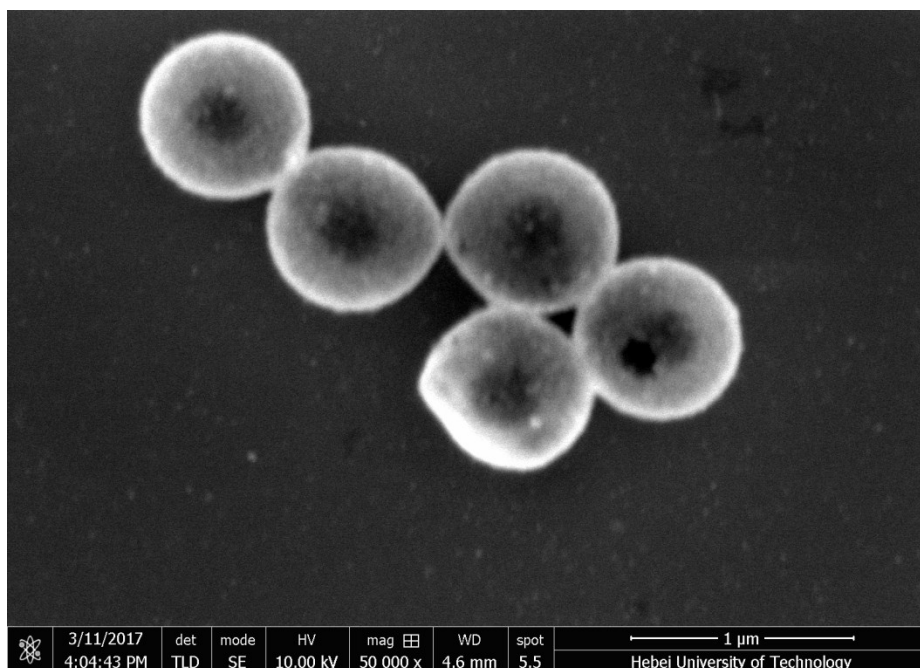

**Fig. S10** The STEM image of Au@HPJMs SiO<sub>2</sub> after 5 cycles.

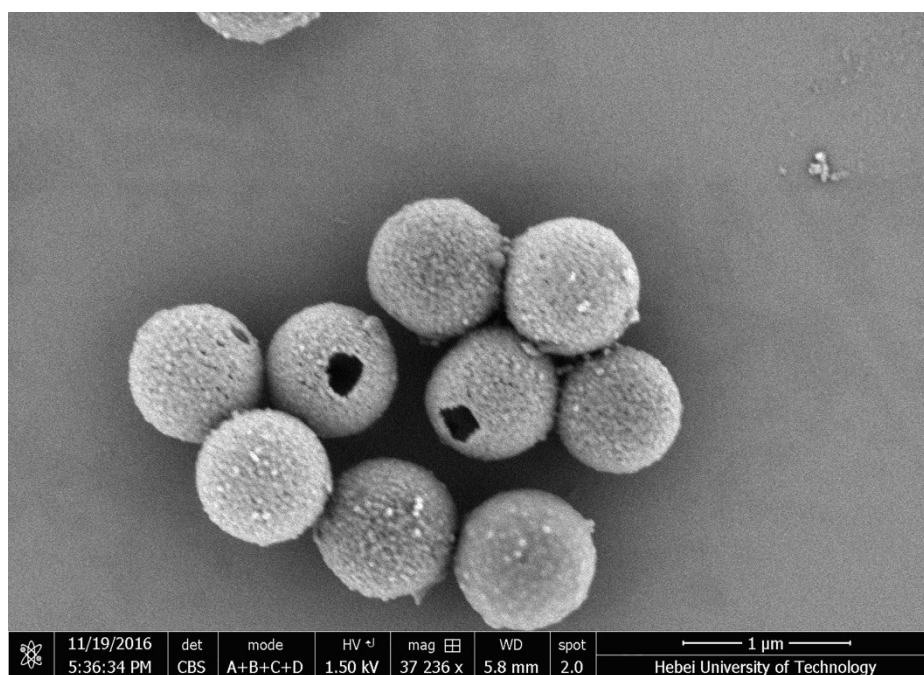

**Fig. S11** The SEM image of HPJs SiO<sub>2</sub>.

**Table S1** Performance comparison of HPJs SiO<sub>2</sub> and HPJMs SiO<sub>2</sub> to enrich organic compounds in aqueous phase

| Parameter               | HPJs SiO <sub>2</sub> | HPJMs SiO <sub>2</sub> |
|-------------------------|-----------------------|------------------------|
| C <sub>0</sub> (mmol/L) | 0.1                   | 0.1                    |
| C <sub>e</sub> (mmol/L) | 0.0655                | 0.0574                 |
| Q <sub>e</sub> (mmol/g) | 0.0103                | 0.0129                 |

Note: the volume of the 4-NP is 3 mL; the amount of HPJs SiO<sub>2</sub> or HPJMs SiO<sub>2</sub> is 0.01 g;

The adsorbing capacity ( $Q_e$ ) was calculated with the following equation:

$$Q_e = \frac{(C_0 - C_e) \times V}{m}$$

$Q_e$ : The amount of adsorption when saturated adsorption is reached, mmol/L;

$C_0$ : The initial concentration of the solution, mmol/L;

$C_e$ : The solution concentration when saturated adsorption is reached, mmol/L;

$V$ : The volume of the 4-nitrophenol, L;

$m$ : The amount of SiO<sub>2</sub> microcapsules or HPJMs SiO<sub>2</sub>, g.

**S1** Turn over frequency (TOF) calculation of Au@HPJMs SiO<sub>2</sub> catalyst active sites

The per-active site's TOF (in 4 min, min<sup>-1</sup>) was calculated according to the following equation:

$$TOF = \frac{n_1 \times C\%}{n_2 \times t}$$

$n_1$ : The molar amount of reactant, mol;

$n_2$ : The molar amount of Au, mol;

$C\%$ : The conversion rate of reactant;

$t$ : The reaction time, min.
